# Supplementary material for: Defects in GABA metabolism affect selective autophagy pathways and are alleviated by mTOR inhibition
Source: PubMed Central journal article supplement (PMC3992080; doi:10.1002/emmm.201303356), 2014-02-27
Supplement: emmm0006-0551-sd6.pdf [file emmm0006-0551-sd6.pdf]

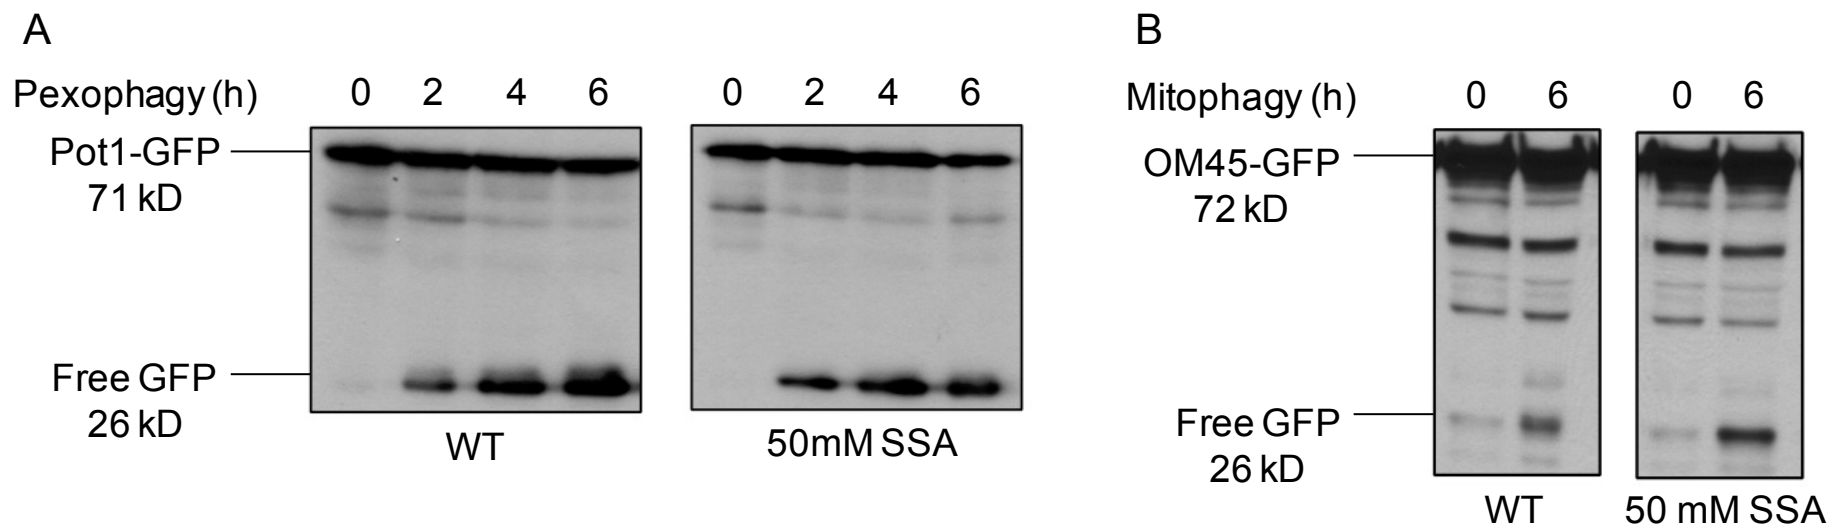

**Figure S5. Increased levels of succinic semialdehyde (SSA) do not inhibit pexophagy or mitophagy.** (A) Pexophagy in the Pot1-GFP wild-type strain (+/- SSA) was analyzed for GFP cleavage by immunoblotting. (B) Mitophagy assays with and without SSA analyzed for GFP cleavage by immunoblotting.
