# Supplementary material for: Defects in GABA metabolism affect selective autophagy pathways and are alleviated by mTOR inhibition
Source: PubMed Central journal article supplement (PMC3992080; doi:10.1002/emmm.201303356), 2014-02-27
Supplement: emmm0006-0551-sd8.pdf [file emmm0006-0551-sd8.pdf]

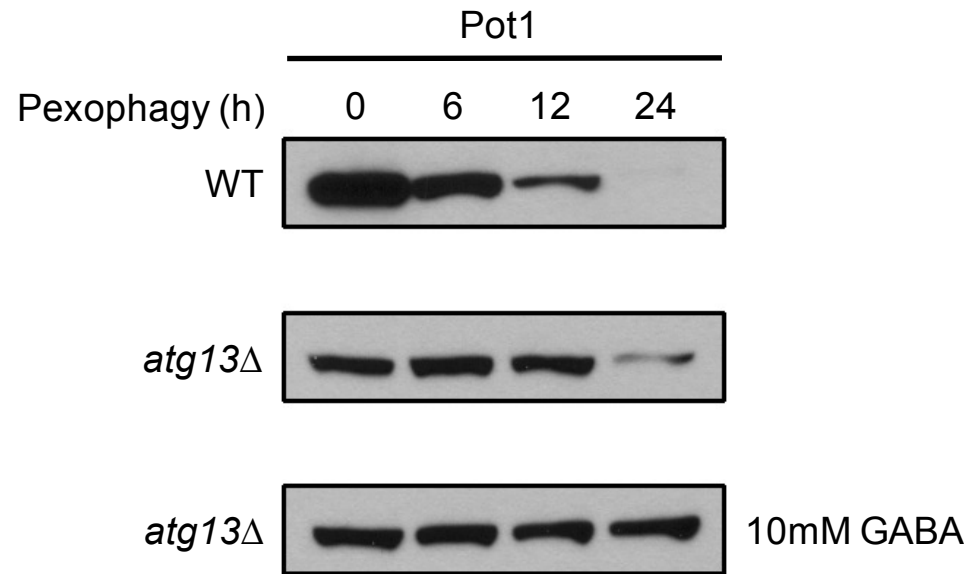

Figure S7. **GABA does not act through Atg13.** WT and *atg13*Δ strains were cultured under pexophagy conditions with or without GABA and samples were analyzed for Pot1 degradation by immunoblotting (45kD).
