# Supplementary material for: Defects in GABA metabolism affect selective autophagy pathways and are alleviated by mTOR inhibition
Source: PubMed Central journal article supplement (PMC3992080; doi:10.1002/emmm.201303356), 2014-02-27
Supplement: emmm0006-0551-sd12.pdf [file emmm0006-0551-sd12.pdf]

| Strain                         | Genotype                                                                                            | Source or reference        |
|--------------------------------|-----------------------------------------------------------------------------------------------------|----------------------------|
| BY4741                         | <i>MATa, his3Δ1, leu2Δ0, met15Δ0, ura3Δ0</i>                                                        | Invitrogen                 |
| BY4742                         | <i>MATα, his3Δ1, leu2Δ0, lys2Δ0, ura3Δ0</i>                                                         | Invitrogen                 |
| POT1-GFP                       | <i>MATα, his3Δ1, leu2Δ0, lys2Δ0, ura3Δ0, pot1::POT1-GFP (HIS5)</i>                                  | (Saleem et al., 2008)      |
| OM45-GFP                       | <i>MATα, his3Δ1, leu2Δ0, lys2Δ0, ura3Δ0, pot1::OM45-GFP (HIS5)</i>                                  | (Kanki and Klionsky, 2008) |
| <i>atg1Δ</i>                   | <i>MATa, his3Δ1, leu2Δ0, met15Δ0, ura3Δ0, atg1::KanMX4</i>                                          | Invitrogen                 |
| <i>atg32Δ</i>                  | <i>MATa, his3Δ1 leu2Δ0 met15Δ0 ura3Δ0, atg32::KanMX4</i>                                            | Invitrogen                 |
| <i>uga1Δ</i>                   | <i>MATa, his3Δ1 leu2Δ0 met15Δ0 ura3Δ0, uga1::KanMX4</i>                                             | Invitrogen                 |
| <i>uga2Δ</i>                   | <i>MATa, his3Δ1 leu2Δ0 met15Δ0 ura3Δ0, uga2::KanMX4</i>                                             | Invitrogen                 |
| <i>sch9Δ</i>                   | <i>MATa, trp1, his3, ura3, leu2, rme1, sch9::kanMX4</i>                                             | (Urban et al., 2007)       |
| <i>tor1Δ tor2<sup>ts</sup></i> | <i>MATa, leu2, ura3, rme1, trp1, his3Δ GAL+ HMLa tor1::HIS3MX6 tor2::KanMX4/YCplac33::tor2-21ts</i> | Dr Michael Hall            |
| TB50a                          | <i>MATa, leu2, ura3, rme1, trp1, his3Δ GAL+ HMLa</i>                                                | Dr Michael Hall            |

**Table S1.** List of strains used in this study.
