# Supplementary material for: Defects in GABA metabolism affect selective autophagy pathways and are alleviated by mTOR inhibition
Source: PubMed Central journal article supplement (PMC3992080; doi:10.1002/emmm.201303356), 2014-02-27
Supplement: emmm0006-0551-sd13.pdf [file emmm0006-0551-sd13.pdf]

| Name           | Relevant characteristics           | Source or reference          |
|----------------|------------------------------------|------------------------------|
| pCK5           | <i>pRS316 RPL25-GFP</i>            | (Kraft et al., 2008)         |
| 2 $\mu$ m GAD1 | <i>YE<math>\rho</math>352-GAD1</i> | (Coleman et al., 2001)       |
| GFP-ATG8       | <i>pRS315 GFP-ATG8</i>             | (Krick et al., 2010)         |
| AT016          | <i>p-mito-mRFP-EGFP</i>            | (Kim et al., 2013, in press) |
| Human Parkin   | <i>pPARKIN</i>                     | (Lazarou et al., 2013)       |

**Table S2.** List of plasmids used in this study.
